# Supplementary material for: Facile preparation of a robust and flexible antioxidant film based on self-polymerized dopamine in a microporous battery separator
Source: Royal Society of Chemistry journal article supplement (doi:10.1039/c2ra01264b), 2012-01-01
Supplement: c2ra01264b.pdf [file c2ra01264b.pdf]

## Electronic Supporting Information

### Facile preparation of robust and flexible antioxidant film based on self-polymerized dopamine in microporous battery separator

Manthiriyappan Sureshkumar, Pin-Ni Lee, Cheng-Kang Lee\*

#### Materials

The microporous PE film (thickness 25 micron; porosity 40%) was purchased from Coin Nanotech Innovation Inc., Taipei, Taiwan and used without further treatment. 3-Hydroxytyramine hydrochloride (99%,  $C_8H_{11}NO_2 \cdot HCl$ ) and 2,2-diphenyl-1-picrylhydrazyl (DPPH), NaOH and  $AgNO_3$  (99.8%) were obtained from Acros (NJ, USA).

#### Preparation of antioxidant PE films

The PE film was treated with a 99% ethanol for few seconds for the preparation of wetted microporous surface. Original and pretreated PE films were immersed in the dopamine solution ( $2 \text{ mg ml}^{-1}$  in Tris-HCl buffer (10 mM, pH 8.5)) for 24 h at RT, which autooxidize dopamine into adhesive polydopamine (Pdop). Subsequently, Pdop-coated samples were thoroughly washed several times with deionized (DI) water.

#### Peeling Test

A peeling test was conducted by applying a piece of Scotch tape (3M) strongly on the PE-Pdop films (surface coated and microslits-filled) and removing it quickly.

#### DPPH assay

The antioxidative activity of PE-Pdop films were measured using the DPPH radical method according to a procedure previously described<sup>1</sup>. H-transfer between antioxidative Polydopamine films and DPPH in a methanol solution was monitored by UV-vis absorption spectrometry at 512 nm (quartz cell length: 1 cm; solvent: methanol).

#### Determination of available phenolic groups on the modified film

In a microtube 0.75 mg of modified PE film and 0.12 mL of Folin-Ciocalteu reagent were placed and stirred for 3 min. Thereafter 0.24 mL of 12%  $Na_2CO_3$  and 0.64 mL of water were added to a final volume of 10 mL. The reaction was kept at room temperature for 48 h. After that, the absorbance was determined at 760 nm. A calibration curve was prepared using garlic acid standard solutions. All determinations were performed in triplicate.

### Stability test

To access the mechanical and chemical stability of flexible antioxidant films, PE-Pdop films were incubated under ultrasonic irradiation (LEO-801 Ultrasonic Steri-Cleaner) (0, 6, 12 and 15 W) for 2 min and in 0.1 N NaOH for 24 h respectively. After incubation DPPH assay was carried out to access the antioxidant efficiency.

### In-situ Silver nanoparticles (SNPs) preparation

PE-Pdop film is immersed in 50 mM of  $\text{AgNO}_3$  solution in dark for 18 h at RT, dissolved metallic silver ions were converted into SNPs by multifunctional groups presents on the surface of Pdop.

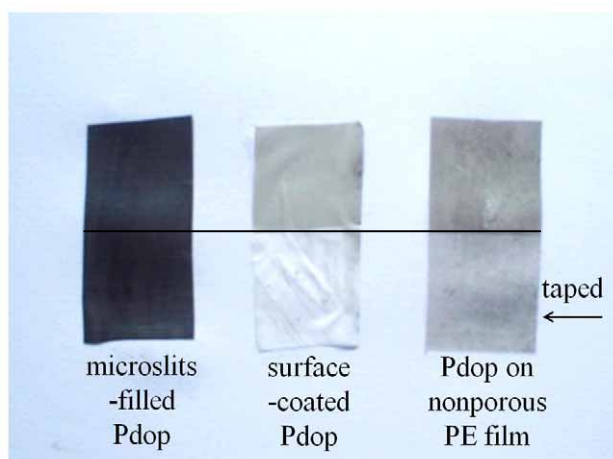

**Fig 1S.** Scotch peeling test of Pdop modified porous PE (microslits filled and surface coated) and nonporous PE films

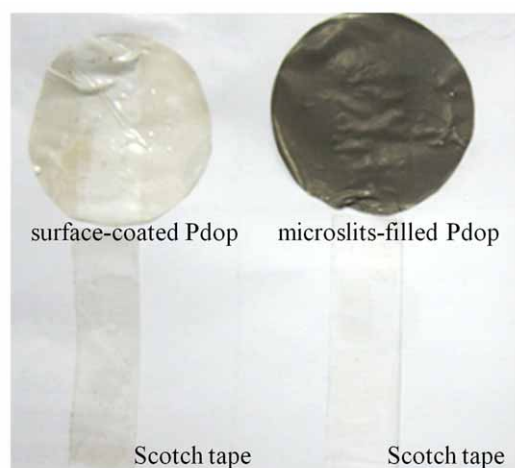

**Fig 2S.** Pdop modified porous PE films (surface coated and microslits-filled) after applying Scotch tape peeling test.

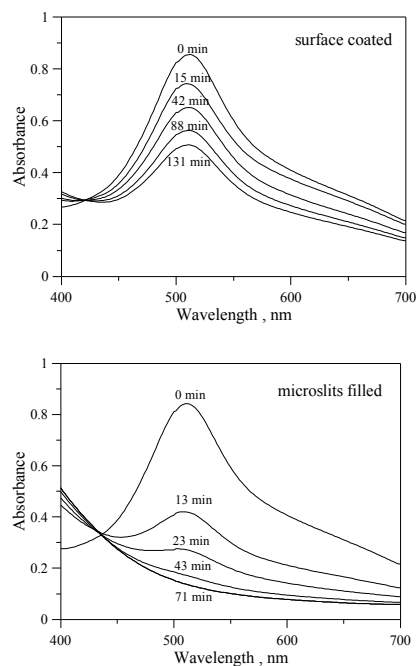

**Fig 3S.** DPPH activity of surface coated and microslits filled PE-Pdop samples.

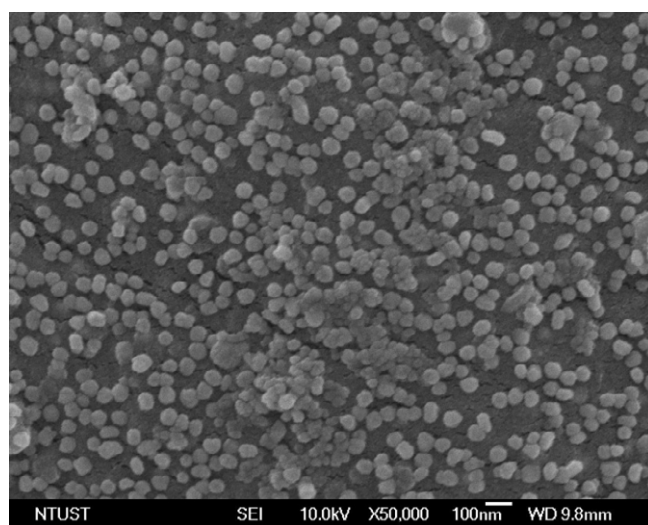

**Fig 4S.** FE-SEM image of silver nanoparticles (SNPs) generated on the surface of Pdop coated PE film

1. E. Portes, C. Gardrat, A. Castellan and V. Coma, *Carbohydrate Polymers*, 2009, **76**, 578-584.
